# Supplementary material for: Radial intercalation is regulated by the Par complex and the microtubule-stabilizing protein CLAMP/Spef1
Source: PubMed Central journal article supplement — J Cell Biol. 2014 Aug 4;206(3):367–76. doi: 10.1083/jcb.201312045 (PMC4121976; doi:10.1083/jcb.201312045), 2014-08-04
Supplement: supp_jcb.201312045_JCB_201312045_sm.pdf [file supp_jcb.201312045_JCB_201312045_sm.pdf]

Werner et al., <http://www.jcb.org/cgi/content/full/jcb.201312045/DC1>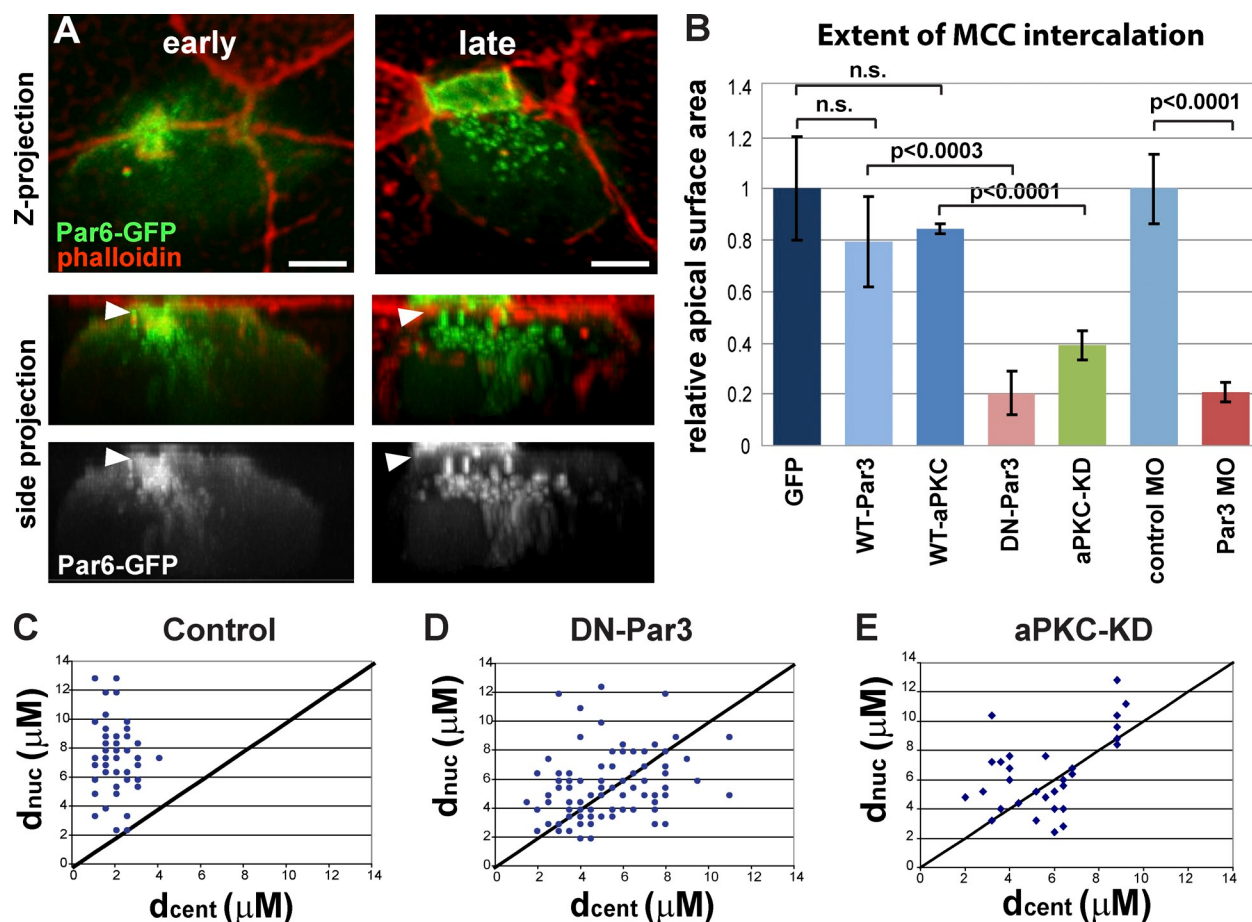

Figure S1. **The Par complex mediates apical positioning of centrioles and MCC intercalation.** (A) Apical localization (arrowheads) of Par6-GFP prior to intercalation (early) and during intercalation (late). (B) Quantification of apical surface area in MCCs from embryos injected with  $\alpha$ -tub promoter-driven GFP ( $n = 523$ ), Par3-GFP ( $n = 179$ ), aPKC-GFP ( $n = 111$ ), DN-Par3 ( $n = 1094$ ), aPKC-KD ( $n = 533$ ), control MO ( $n = 191$ ), or Par3 MO ( $n = 208$ ; see Fig. 1 I). Statistical significance was determined using a  $t$  test. Error bars represent standard deviations. (C–E) Scatter plot showing the distance of the center of the centriole cluster ( $d_{\text{cent}}$ ) and the distance of the center of the nucleus ( $d_{\text{nuc}}$ ) from the apical surface in individual MCCs from embryos injected with  $\alpha$ -tub promoter-driven GFP (C), DN-Par3 (D), and aPKC-KD (E; see Fig. 1, D–F). Scatter plots in C–E are based on at least 10 cells, each from a total of at least five embryos from at least two independent experiments. Bars, 5  $\mu\text{m}$ .

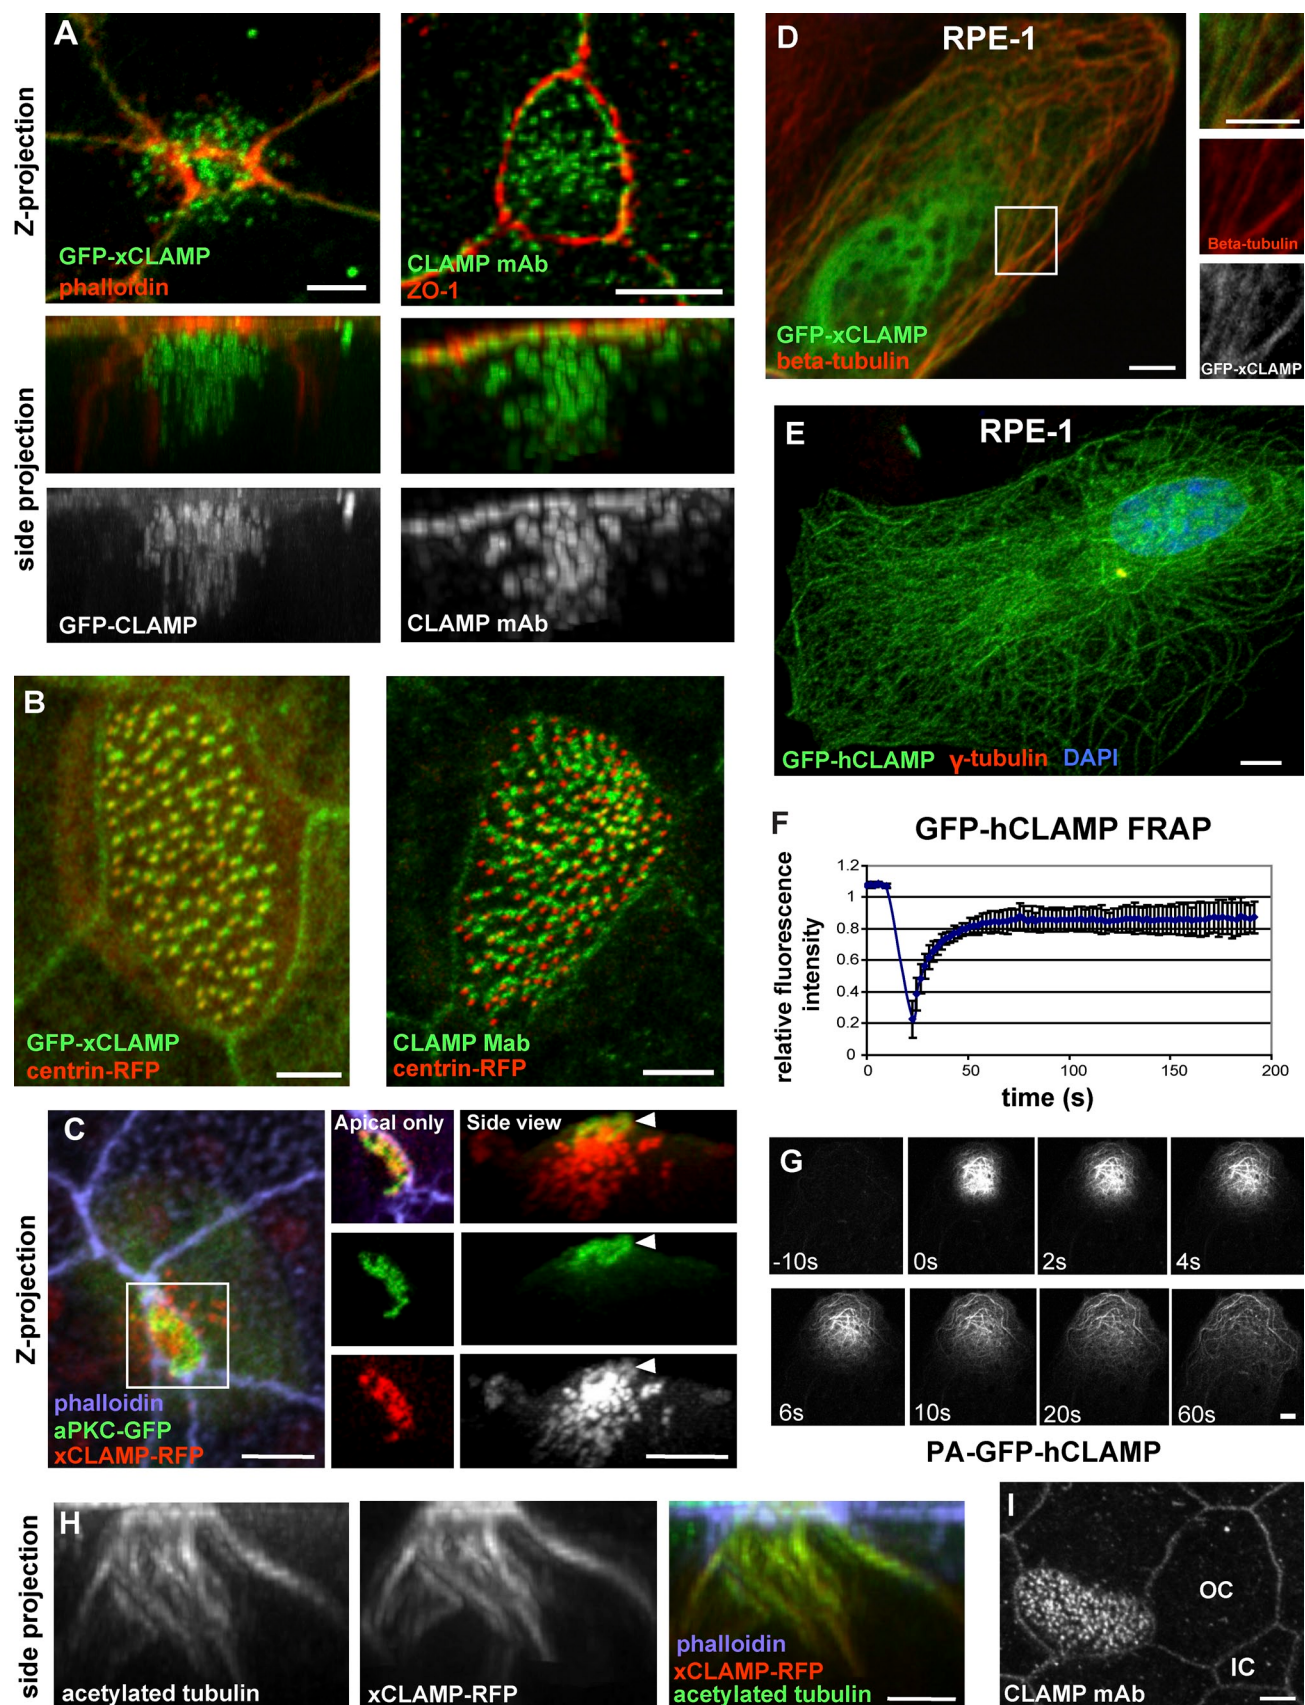

Figure S2. **CLAMP is enriched at centrioles and rootlets and dynamically associates with microtubules.** (A and B) Comparison of the localization of GFP-CLAMP (left) and CLAMP mAb staining (right) in MCCs during (A) and after completion (B) of intercalation. (C) Partial colocalization of xCLAMP-GFP and aPKC-GFP at the leading edge of intercalating MCCs (arrowheads), maximum intensity projection (left), apical optical section only (middle), and corresponding cross sections (right) are shown. (D) Colocalization of xCLAMP-GFP with MTs in RPE-1 cells stained with  $\beta$ -tubulin antibody. The boxed region is enlarged on the right. (E) Localization of hCLAMP-GFP in RPE-1 cells stained with  $\gamma$ -tubulin and DAPI. (F) Quantification of FRAP of hCLAMP-GFP in RPE-1 cells (see Video 1). The mean fluorescence intensity of three independent measurements is shown. Error bars represent the standard deviation. (G) Still frames of live imaging of photoactivatable hCLAMP-GFP (see Video 2). Time stamps are relative to photoactivation (0 s). (H) Colocalization of CLAMP-RFP with anti-acetylated tubulin staining in an intercalating IC. (I) Anti-CLAMP mAb staining highlighting CLAMP staining in OCs (OC) and ICs (IC). Cells were quantified from at least five embryos total, from at least two independent experiments. Bars, 5  $\mu$ m.

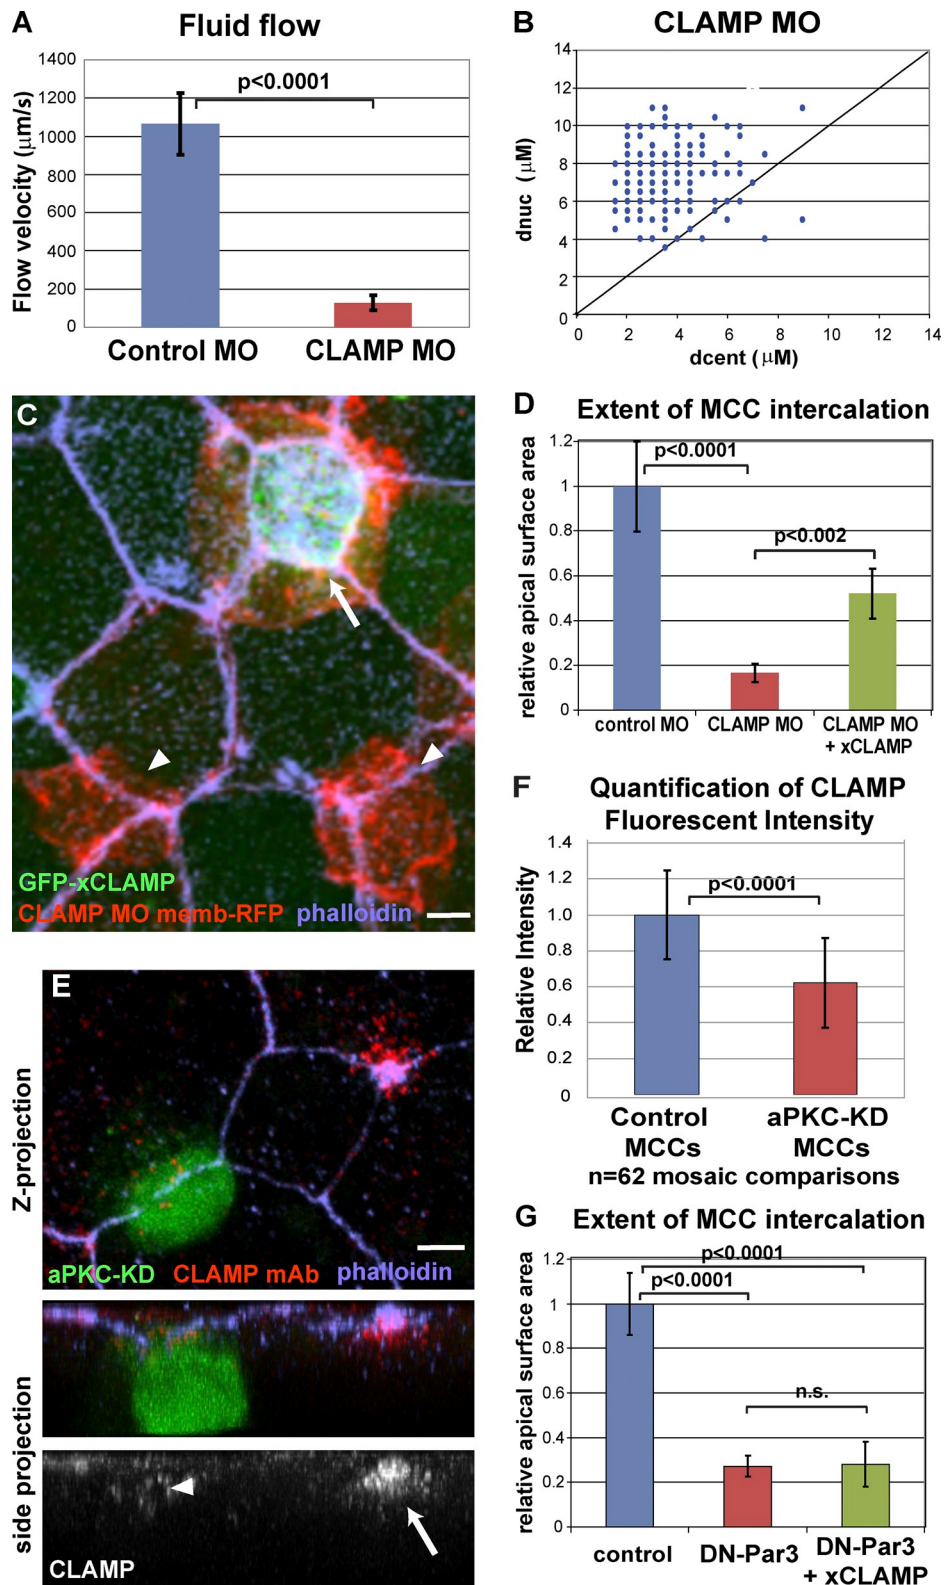

Figure S3. **CLAMP is required for MCC intercalation but not centriole positioning.** (A) Quantification of cilia-driven fluid flow in embryos injected with control MO ( $n = 10$  embryos) and CLAMP MO ( $n = 10$  embryos). (B) Analysis of centriole cluster versus nuclear position relative to the apical surface in MCCs from embryos injected with CLAMP MO showing distribution of individual cells (see Fig. 4 H). (C) Representative image of a mosaic embryo injected with CLAMP MO and membrane-RFP followed by separate injection of GFP-xCLAMP. Morphant MCCs not expressing GFP-xCLAMP (arrowheads) fail to intercalate whereas intercalation is rescue by expression of GFP-xCLAMP in morphant MCCs (arrow). (D) Quantification of apical surface size in MCCs from embryos injected with a control MO ( $n = 533$ ), CLAMP MO ( $n = 429$ ), or CLAMP MO together with GFP-xCLAMP ( $n = 140$ ; see Fig. 4 D). (E and F) Representative image (E) and quantification (F) of apical CLAMP localization using anti-CLAMP mAb (red) in embryos mosaic for aPKC-KD-GFP (green, arrowheads) and wild-type (arrows). (G) Quantification of apical surface area in control ( $n = 533$ ), DN-Par3-GFP ( $n = 564$ ), or DN-Par3-GFP and CLAMP-RFP ( $n = 546$ ) expressing MCCs. The scatter plot in B is based on at least 10 cells each from a total of five embryos from at least two independent experiments. Statistical significance in A, C, E, and G was determined using a *t* test. Bars, 5  $\mu\text{m}$ . Error bars represent the standard deviation.

Table S1. Statistics for the figures calculated either with a *t* test or with a  $\chi^2$  analysis as labeled

| Figure    | Treatment         | P-value ( <i>t</i> test) | $\chi^2$    | P-value ( $\chi^2$ )          | Compared to |
|-----------|-------------------|--------------------------|-------------|-------------------------------|-------------|
| Fig. 1 F  | DN-par3           |                          | 39.7144551  | $2.37747 \times 10^{-9}$      | GFP         |
|           | aPKC-KD           |                          | 35.31657559 | $2.1434 \times 10^{-8}$       | GFP         |
| Fig. 1 I  | DN-par3           |                          | 721.5177099 | $2.1107 \times 10^{-157}$     | GFP         |
|           | aPKC-KD           |                          | 262.142021  | $1.19284332 \times 10^{-57}$  | GFP         |
|           | DN-par3           |                          | 348.3906623 | $2.22807 \times 10^{-76}$     | Par3 GFP    |
|           | aPKC-KD           |                          | 63.83993312 | $1.37194 \times 10^{-14}$     | apKC GFP    |
|           | Par3 MO           |                          | 390.5149424 | $1.58766 \times 10^{-85}$     | GFP         |
| Fig. 2 D  | Nocodazole        |                          | 327.5234061 | $7.57174555 \times 10^{-72}$  | DMSO        |
| Fig. 2 F  | Nocodazole        |                          | 463.9809481 | $1.7694 \times 10^{-101}$     | DMSO        |
| Fig. 3 J  | CLAMP MO          | $6.96913 \times 10^{-8}$ |             |                               | Control     |
| Fig. 4 D  | CLAMP MO          |                          | 713.858355  | $9.71913876 \times 10^{-156}$ | Control MO  |
|           | CLAMP MO + xCLAMP |                          | 134.1267674 | $7.4945 \times 10^{-30}$      | CLAMP MO    |
|           | CLAMP MO + hCLAMP |                          | 74.74213147 | $5.88779 \times 10^{-17}$     | CLAMP MO    |
| Fig. 4 F  | CLAMP MO          |                          | 146.1641109 | $1.82334 \times 10^{-32}$     | Control MO  |
| Fig. 4 H  | CLAMP MO          |                          | 2.888315647 | 0.2359447                     | Control MO  |
| Fig. 4 J  | DN-par3           | 0.008498493              |             |                               | Control     |
| Fig. S1 B | DN-par3           | $4.59449 \times 10^{-6}$ |             |                               | GFP         |
|           | aPKC-KD           | $3.18137 \times 10^{-5}$ |             |                               | GFP         |
|           | DN-par3           | 0.000220952              |             |                               | Par3 GFP    |
|           | aPKC-KD           | $4.51732 \times 10^{-5}$ |             |                               | apKC GFP    |
|           | Par3 MO           | $1.17197 \times 10^{-5}$ |             |                               | control MO  |
| Fig. S3 A | CLAMP MO          | $1.50306 \times 10^{-6}$ |             |                               | Control MO  |
| Fig. S3 D | CLAMP MO          | $4.29704 \times 10^{-5}$ |             |                               | Control MO  |
|           | CLAMP MO + xCLAMP | 0.001887014              |             |                               | CLAMP MO    |
| Fig. S3 F | aPKC-KD           | $2.24784 \times 10^{-6}$ |             |                               | Control     |
| Fig. S3 G | DN-par3           | $2.17682 \times 10^{-5}$ |             |                               | GFP         |
|           | DN-par3 + xCLAMP  | $1.32251 \times 10^{-5}$ |             |                               | GFP         |
|           | DN-par3 + xCLAMP  | 0.886014042              |             |                               | DN-par3     |

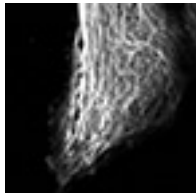

Video 1. **CLAMP dynamically interacts with MTs.** Representative FRAP experiment of an RPE-1 cell transfected with hCLAMP-GFP as quantified in Fig. 4 E. Images were collected using laser-scanning time-lapse confocal microscopy (A1R; Nikon). Frames were collected every 2 s.

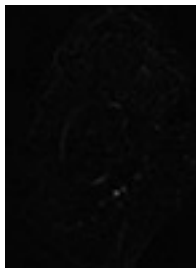

Video 2. **CLAMP rapidly diffuses throughout the cytoplasm.** Movie of a photoactivation experiment in an RPE cell transfected with PA-GFP-hCLAMP shown in Fig. 4 F. Images were collected using laser-scanning time-lapse confocal microscopy (A1R; Nikon). Frames were collected every 2 s.
